# Supplementary material
Source: Springer Nature journal article supplement (https://www.springermedizin.de/resource/supplementary/12936_2013_3001_MOESM2_ESM.pdf/9544822)

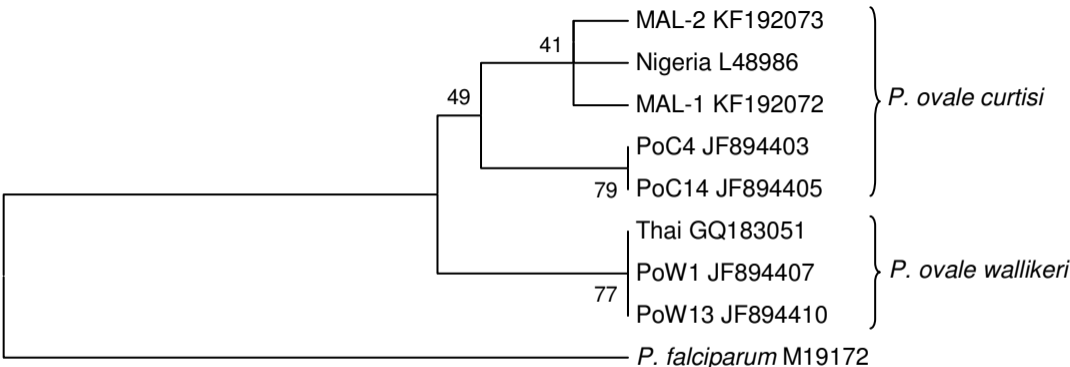

0.01

Supplement: MOESM2 [file 9544822]
